# Supplementary material
Source: Springer Nature journal article supplement (https://www.springermedizin.de/resource/supplementary/12985_2009_623_MOESM9_ESM.pdf/9608128)

**A****Effect of Cathepsin B Treatment of 3H incorporated Reporter-virions on Binding**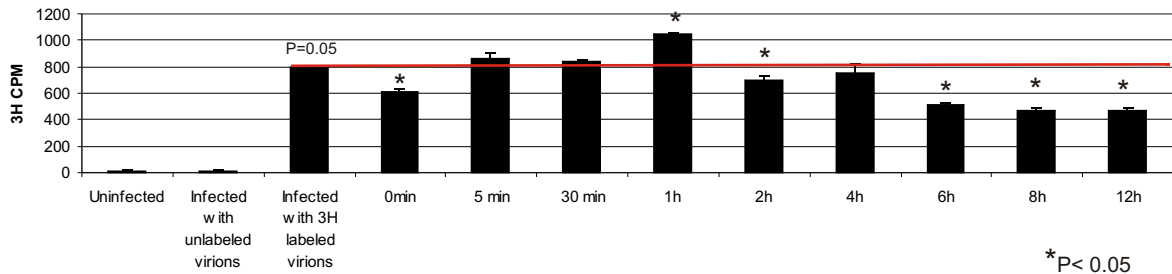**B****Effect of Cathepsin L Treatment of 3H incorporated Reporter-virions on Binding**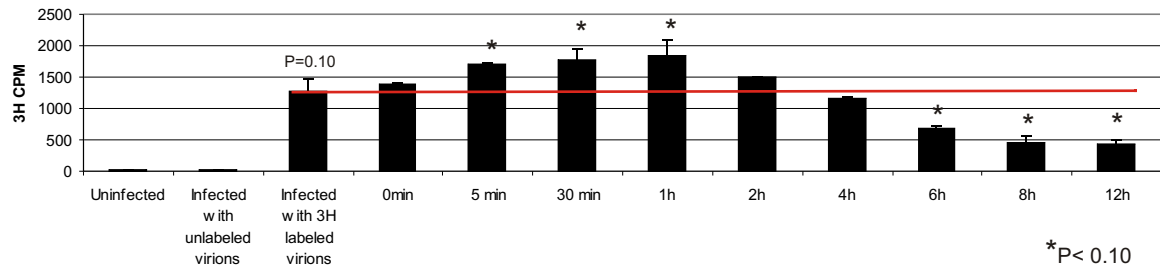

Supplement: MOESM9 [file 9608128]
